# Supplementary material
Source: publisher figshare collection journal article supplement (https://frontiersin.figshare.com/ndownloader/files/22654808)

**SUPPLEMENTARY MATERIAL - Discovery and characterization of a new cold-active protease from an extremophilic bacterium via comparative genome analysis and *in vitro* expression (Perfumo et al. 2020)**

| <b>Table S1 Overview of bacterial strains used in this study, taxonomic identification and qualitative assessment of enzymatic activities (proteolytic and lipolytic, with further discrimination between esterases and lipases) in the temperature range of 4-18°C.</b> |                                               |                                       |                             |                           |                  |                |
|--------------------------------------------------------------------------------------------------------------------------------------------------------------------------------------------------------------------------------------------------------------------------|-----------------------------------------------|---------------------------------------|-----------------------------|---------------------------|------------------|----------------|
| <b>No.</b>                                                                                                                                                                                                                                                               | <b>Bacterial strains</b>                      | <b>16S rRNA sequence similarity %</b> | <b>Proteolytic activity</b> | <b>Lipolytic activity</b> | <b>Esterases</b> | <b>Lipases</b> |
| <b>Phylum Actinobacteria</b>                                                                                                                                                                                                                                             |                                               |                                       |                             |                           |                  |                |
| 1                                                                                                                                                                                                                                                                        | <i>Aeromicrobium ginsengisoli</i> 27-6PB      | 99                                    |                             | ✓                         |                  | ✓              |
| 2                                                                                                                                                                                                                                                                        | <i>Arthrobacter humicola</i> 07-06PB          | 99                                    | ✓                           | ✓                         |                  | ✓              |
| 3                                                                                                                                                                                                                                                                        | <i>Arthrobacter humicola</i> 27-02PB          | 96                                    |                             | ✓                         |                  | ✓              |
| 4                                                                                                                                                                                                                                                                        | <i>Arthrobacter ramosus</i> 17-07PB           | 99                                    |                             | ✓                         |                  | ✓              |
| 5                                                                                                                                                                                                                                                                        | <i>Arthrobacter stackebrandtii</i> 28-2PB     | 97                                    | ✓                           | ✓                         | ✓                | ✓              |
| 6                                                                                                                                                                                                                                                                        | <i>Arthrobacter oryzae</i> 26-9PB             | 99                                    | ✓                           | ✓                         | ✓                |                |
| 7                                                                                                                                                                                                                                                                        | <i>Arthrobacter oxydans</i> 12-01PB           | 99                                    | ✓                           | ✓                         | ✓                |                |
| 8                                                                                                                                                                                                                                                                        | <i>Cryobacterium psychrotolerans</i> 15-01bPB | 99                                    |                             |                           |                  |                |
| 9                                                                                                                                                                                                                                                                        | <i>Demetria terragens</i> 13-07PB             | 94                                    |                             | ✓                         |                  | ✓              |
| 10                                                                                                                                                                                                                                                                       | <i>Demetria terragens</i> 14-07PB             | 93                                    |                             | ✓                         |                  | ✓              |
| 11                                                                                                                                                                                                                                                                       | <i>Frigoribacterium</i> sp. 25-14PB           | 98                                    |                             |                           |                  |                |
| 12                                                                                                                                                                                                                                                                       | <i>Frigoribacterium faeni</i> 27-4PB          | 98                                    |                             |                           |                  |                |
| 13                                                                                                                                                                                                                                                                       | <i>Humicoccus flavidus</i> 93-01PB            | 97                                    |                             | ✓                         | ✓                |                |
| 14                                                                                                                                                                                                                                                                       | <i>Leifsonia kafniensis</i> 27-3PB            | 98                                    |                             |                           |                  |                |
| 15                                                                                                                                                                                                                                                                       | <i>Streptomyces psammoticus</i> 10-1PB        | 98                                    |                             | ✓                         |                  |                |
| 16                                                                                                                                                                                                                                                                       | <i>Streptomyces herbaricolor</i> 08-02PB      | 98                                    |                             | ✓                         | ✓                | ✓              |
| 17                                                                                                                                                                                                                                                                       | <i>Streptomyces clavifer</i> 11-03PB          | 98                                    |                             | ✓                         |                  | ✓              |
| <b>Phylum/class gamma-proteobacteria</b>                                                                                                                                                                                                                                 |                                               |                                       |                             |                           |                  |                |
| 18                                                                                                                                                                                                                                                                       | <i>Pseudomonas frederiksbergensis</i> 18-02PB | 99                                    | ✓                           | ✓                         |                  |                |
| 19                                                                                                                                                                                                                                                                       | <i>Pseudomonas mandelii</i> 18-01PB           | 100                                   | ✓                           | ✓                         | ✓                | ✓              |
| 20                                                                                                                                                                                                                                                                       | <i>Pseudomonas meridiana</i> 25-13PB          | 99                                    | ✓                           | ✓                         | ✓                | ✓              |
| 21                                                                                                                                                                                                                                                                       | <i>Pseudomonas migulae</i> 20-02PB            | 99                                    | ✓                           | ✓                         | ✓                | ✓              |
| 22                                                                                                                                                                                                                                                                       | <i>Pseudomonas thivervalensis</i> 18-03PB     | 99                                    | ✓                           | ✓                         |                  | ✓              |
| 23                                                                                                                                                                                                                                                                       | <i>Psychrobacter glacincola</i> 94-6PB        | 98                                    | ✓                           | ✓                         |                  | ✓              |
| 24                                                                                                                                                                                                                                                                       | <i>Rhodanobacter ginsengisoli</i> 28-4PB      | 99                                    |                             | ✓                         |                  |                |
| <b>Phylum/class alpha-proteobacteria</b>                                                                                                                                                                                                                                 |                                               |                                       |                             |                           |                  |                |
| 25                                                                                                                                                                                                                                                                       | <i>Brevundimonas subvibrioides</i> 94-07PB    | 99                                    |                             | ✓                         |                  |                |
| 26                                                                                                                                                                                                                                                                       | <i>Methylobacterium organophilum</i> 05-05PB  | 97                                    |                             | ✓                         |                  | ✓              |
| 27                                                                                                                                                                                                                                                                       | <i>Sphingomonas aerolata</i> 25-8PB           | 99                                    |                             | ✓                         |                  | ✓              |
| 28                                                                                                                                                                                                                                                                       | <i>Sphingomonas meloni</i> 05-07PB            | 98                                    | ✓                           | ✓                         |                  | ✓              |
| 29                                                                                                                                                                                                                                                                       | <i>Sphingomonas oligophenolica</i> 27-1PB     | 98                                    |                             | ✓                         |                  |                |
| <b>Phylum Bacteroidetes</b>                                                                                                                                                                                                                                              |                                               |                                       |                             |                           |                  |                |
| 30                                                                                                                                                                                                                                                                       | <i>Chryseobacterium marinum</i> 15-04PB       | 98                                    |                             | ✓                         |                  | ✓              |
| 31                                                                                                                                                                                                                                                                       | <i>Pedobacter composti</i> 26-12PB            | 96                                    |                             |                           |                  |                |
| 32                                                                                                                                                                                                                                                                       | <i>Salinibacterium xinjiangense</i> 28-7PB    | 98                                    |                             | ✓                         | ✓                | ✓              |
| <b>Phylum Deinococcus</b>                                                                                                                                                                                                                                                |                                               |                                       |                             |                           |                  |                |
| 33                                                                                                                                                                                                                                                                       | <i>Deinococcus claudionis</i> 28-1PB          | 99                                    |                             | ✓                         |                  |                |

**Table S2 List of genomes of *Psychrobacter* strains harboring homologous genes coding for an extracellular protease that were used for comparative analysis in this study.**

| No. | <i>Psychrobacter</i> sp.            | Accession         | Region (bp)        | Gene locus tag                              |
|-----|-------------------------------------|-------------------|--------------------|---------------------------------------------|
| 1   | <i>P. aquaticus</i> CMS56           | AUSW01000030.1    | 149178 to 151391   | M917_1730                                   |
| 2   | <i>P. arcticus</i> 273-4*           | NC_007204.1       | 342393 to 344603   | PSYC_RS01465                                |
| 3   | <i>P. cryohalolentis</i> K5*        | NC_007969.1       | 372014 to 374224   | PCRYO_RS01610                               |
| 4   | <i>P. glacincola</i> BNF20*         | LIQB01000001.1    | 60081 to 62288     | AMK37_RS00245                               |
| 5   | <i>P. lutiphocae</i> DSM21542*      | NZ_KB907628.1     | 80577 to 82763     | H140_RS0104250                              |
| 6   | <i>P. pacificensis</i> DSM23406     | FNAL01000001.1    | 178827 to 181004   | SAMN05660405_00155                          |
| 7   | <i>P. piscatorii</i> LQ58           | LNDJ01000053.1    | 35377 to 37554     | AS194_06220                                 |
| 8   | <i>P. urativorans</i> R10.10B*      | NZ_CP012678.1     | 1862745 to 1864976 | AOC03_RS08025                               |
| 9   | <i>Psychrobacter</i> sp. 4Dc        | PJAT01000134.1    | 70914 to 73121     | CXF61_12220                                 |
| 10  | <i>Psychrobacter</i> sp. AC24       | AYXM01000014.1    | 89917 to 92120     | n.a.                                        |
| 11  | <i>Psychrobacter</i> sp. C20.9      | MRYC01000025.1    | 12337 to 14550     | BTW00_12985                                 |
| 12  | <i>Psychrobacter</i> sp. DAB_AL32B  | NEXU01000052.1    | 64665 to 66877     | CAN34_06130                                 |
| 13  | <i>Psychrobacter</i> sp. ENNN9_III  | LNUO01000025.1    | 35539 to 37749     | n.a.                                        |
| 14  | <i>Psychrobacter</i> sp. G*         | NC_021661.1       | 371405 to 373615   | PSYCG_RS01570                               |
| 15  | <i>Psychrobacter</i> sp. JCM 18902* | BAWI01000001.1    | 459222 to 461434   | JCM18902_419                                |
| 16  | <i>Psychrobacter</i> sp. JCM 18903* | BAWJ01000020.1    | 40552 to 42759     | JCM18903_2750                               |
| 17  | <i>Psychrobacter</i> sp. P11F6*     | LJCE01000001.1    | 441754 to 443961   | AK822_RS01875 <sup>[L]</sup> <sub>SEP</sub> |
| 18  | <i>Psychrobacter</i> sp. P11G3*     | LJCF01000001.1    | 418193 to 420400   | AK824_RS01750                               |
| 19  | <i>Psychrobacter</i> sp. PAMC21119* | NZ_AHVZ01000041.1 | 142936 to 145146   | RH96_RS14040                                |
| 20  | <i>Psychrobacter</i> sp. PRwf-1*    | NC_009524.1       | 376938 to 379145   | PSYCPRWF_RS01590                            |

Gene sequences in strains marked with (\*) were used to design PCR/sequencing primers for this study.

n.a. not available.

| <b>Primer name</b> | <b>Primer sequence (5' to 3')</b> | <b>T<sub>a</sub> (°C)</b> | <b>Forward (F) or reverse (R)</b> | <b>Binding position (bp)</b> |
|--------------------|-----------------------------------|---------------------------|-----------------------------------|------------------------------|
| P1                 | CGYAGCGTGTAAGATTG                 | 46 °C                     | F                                 | 5' UTR (300 upstr)           |
| P4                 | GTRACVCCTGAYTCTTCTTG              | 46 °C                     | R                                 | 1133                         |
| P5                 | CAAGAAGARTCAGGBGTYAC              | 46 °C                     | F                                 | 1112                         |
| P6                 | TTDATBGTATCCCAAGGCA               | 46 °C                     | R                                 | 1780                         |
| P9                 | CTGGATAACCTAGCATTGG               | 46 °C                     | F                                 | 1618                         |
| P10                | GTTTGATTTCGTGGTAAGC               | 46 °C                     | F/R                               | 1027 (F); 2183 (R)           |
| P20                | AGCCTTATCATCCTTAATCAGC            | 49 °C                     | R                                 | 3' UTR (203 downstr)         |
| P24                | ACAGCAAGATCCGCAGTTCG              | 49 °C                     | F                                 | 1862                         |
| P26                | GCTTAACTAGTATCAACACTGCTG          | 49 °C                     | F                                 | 5' UTR (54 upstr)            |

**Figure S1 Plate screening assays for the detection of proteolytic and lipolytic activities in isolates of Antarctic bacteria.** Calcium caseinate agar plate with spotted bacterial cultures tested for the synthesis of extracellular proteases at 18°C (strains R2, Co1 and M1 positive, strains O2 and X1 negative) (A). Triolein-rhodamine B agar plate with a spotted bacterial culture (strain F3) positive for the synthesis of extracellular lipase at 18°C (B).

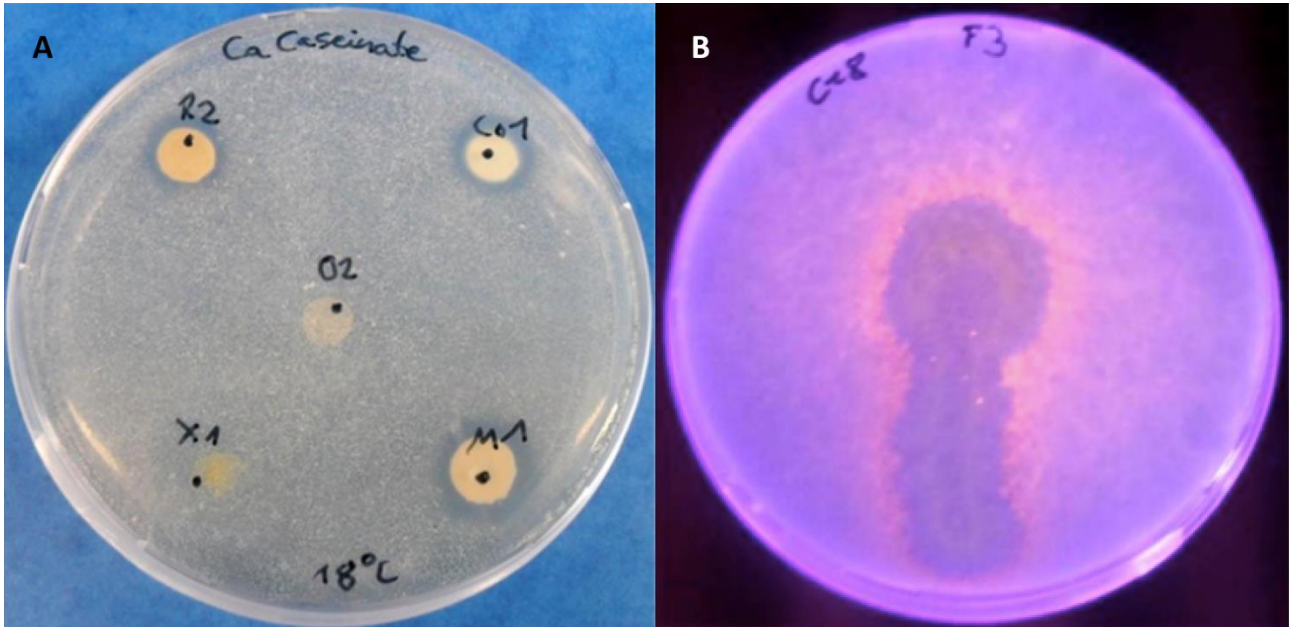

**Figure S2 Images of agarose gels showing the protease gene of *Psychrobacter* sp. 94-6PB amplified in three main overlapping fragments and as full length amplicon.** Fragment 1 was PCR amplified with primers P1-f + P6-r (product size 2080 bp); fragment 2 with primers P10-f + P10-r; product size 1156 bp; fragment 3 with primers P24-f + P20-r (product size 555 bp); the full length gene including upstream and downstream regions was obtained with primers P26-f + P20-r (product size 2471 bp). Molecular marker is shown on the left hand side of the gels.

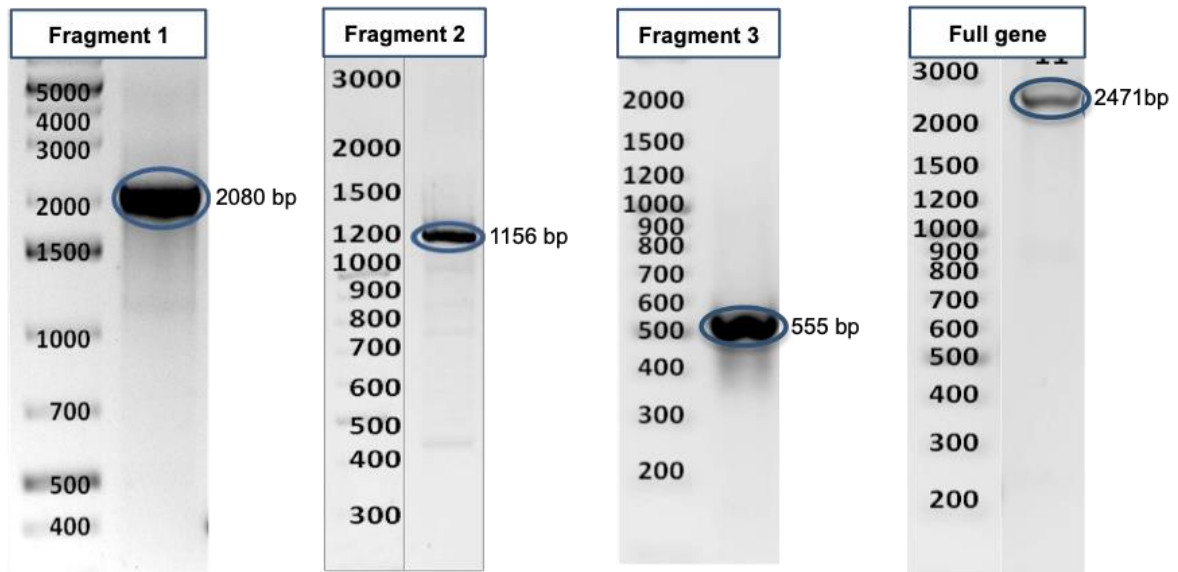

**Figure S3 Molecular phylogenetic analysis of serine protease enzymes in *Psychrobacter* bacteria.** The evolutionary history was inferred by using the Maximum Likelihood method based on the Tamura-Nei model. The tree with the highest log likelihood (-21424.39) is shown. The percentage of trees in which the associated taxa clustered together is shown next to the branches. Initial tree(s) for the heuristic search were obtained automatically by applying Neighbor-Join and BioNJ algorithms to a matrix of pairwise distances estimated using the Maximum Composite Likelihood (MCL) approach, and then selecting the topology with superior log likelihood value. The tree is drawn to scale, with branch lengths measured in the number of substitutions per site. The analysis involved 22 nucleotide sequences of *Psychrobacter* spp. from terrestrial (brown colored), aquatic (blue colored) and host-associated (red colored), and *Moraxella lincolnii* CCUG 9405 as outgroup. Codon positions included were 1st+2nd+3rd+Noncoding. All positions containing gaps and missing data were eliminated. There were a total of 1947 positions in the final dataset. Evolutionary analyses were conducted in MEGA7.

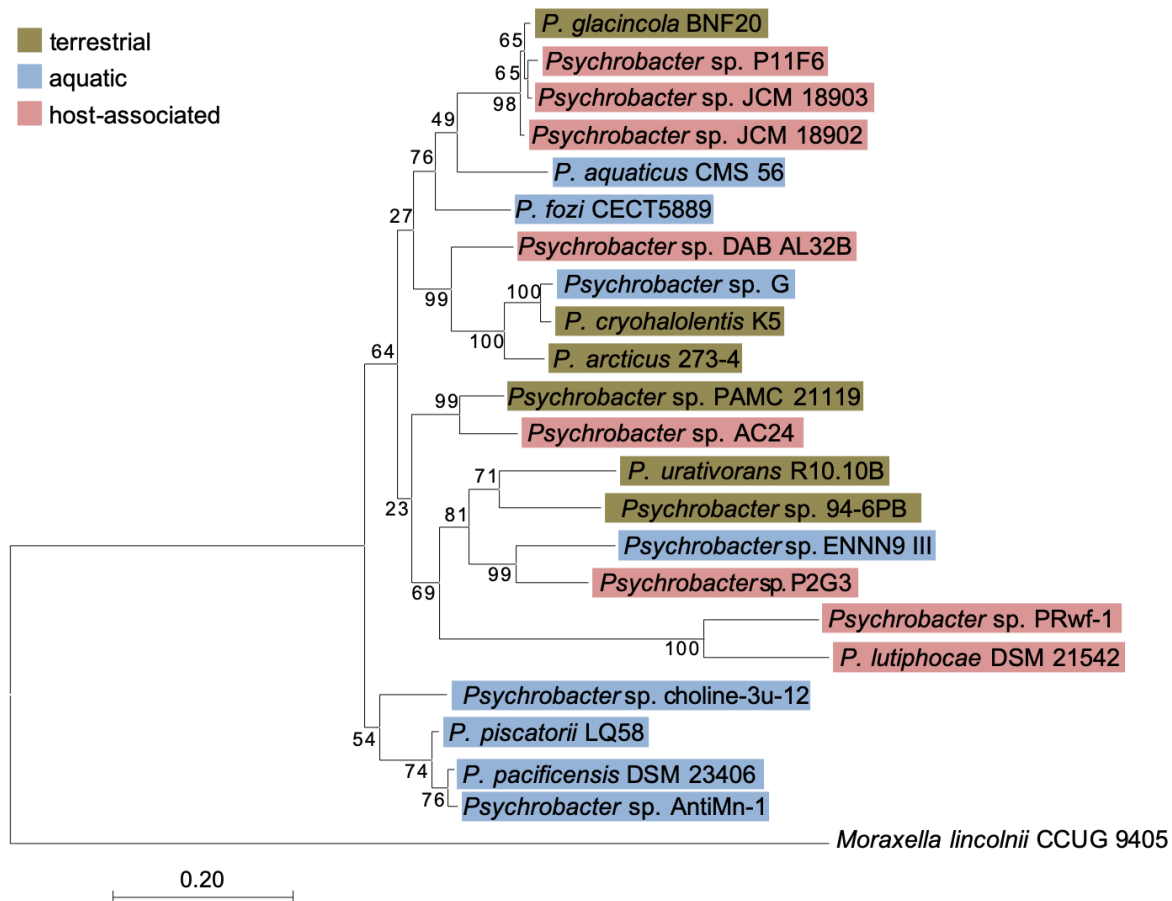

Supplement: Supplementary file [file 22654808]
